# Supplementary material for: miR-193b-3p Promotes Proliferation of Goat Skeletal Muscle Satellite Cells through Activating IGF2BP1
Source: MDPI journal article supplement (doi:10.3390/ijms232415760), 2022-12-12
Supplement: s1 [file s1]

**Supplementary Table S1 Primers information for genes**

| <i>Gene</i>                             | Sequence of primer (5'-3') | T <sub>m</sub> (°C) | Size (bp) |
|-----------------------------------------|----------------------------|---------------------|-----------|
| <i>PGK1</i><br>(XM_005700601.3)         | F: TGGACCTGTGGGTGTATT      | 60.3                | 159       |
|                                         | R: CTGACTTTATCCTCCGTGTT    |                     |           |
| <i>SDHA</i><br>(XM_018065656.1)         | F: GGAACATGGAGGAGGACAAC    | 60.3                | 187       |
|                                         | R: CCAAAGGCACGCTGGTAGA     |                     |           |
| <i>β-actin</i><br>(NM_001314342.1)      | F: GCGGCATTACGAACTAC       | 63.3                | 145       |
|                                         | R: AGGGCAGTGATCTCTTTCT     |                     |           |
| <i>IGF2BP1</i><br>(XM_013972119.2)      | F: CCCAGTCCAAGATCGACGTA    | 52.0                | 150       |
|                                         | R: CAGCCGTTTTGGTGTCTTG     |                     |           |
| <i>miR-193b-3p</i>                      | F: AACTGGCCACAAAGTCCCGCT   | 53.9                | -         |
| <i>chi-MKL2</i><br>(XM_018040535.1)     | F: AAGCACAAGATTCGGAGTC     | 60.3                | 202       |
|                                         | R: TGGAGTCTACAGGAAGGATG    |                     |           |
| <i>chi-PARN</i><br>(XM_013974855.2)     | F: GAATCACCATTACCACGCCAA   | 53.9                | 120       |
|                                         | R: GTGTCAGAAATCTCCCCGA     |                     |           |
| <i>chi-BFAR</i><br>(XM_005697517.3)     | F: TCTACAGAGACAGGTTTTAT    | 58.3                | 316       |
|                                         | R: AGAGGACAGATGGTGTGAAT    |                     |           |
| <i>mmu-β-actin</i><br>(XM_030254057.1)  | F: GGCTATGCTCTCCCTCACG     | 55.9                | 130       |
|                                         | R: CACGCACGATTTCCCTCTC     |                     |           |
| <i>mmu-GAPDH</i><br>(XM_017321385.2)    | F: AGGTTGTCTCCTGCGACTTCA   | 62.0                | 294       |
|                                         | R: TGGTCCAGGGTTTCTTACTCC   |                     |           |
| <i>mmu-Hprt</i><br>(NM_013556.2)        | F: GATCAGTCAACGGGGGACATA   | 62.0                | 199       |
|                                         | R: ATCCAACACTTCGAGAGGTCC   |                     |           |
| <i>mmu-IGF2BP1</i>                      | F: GAAACACCTGACTCCAAAGTTC  | 62.4                | 138       |
| <i>(NM_009951.4)</i>                    | R: GGTCTCTAGCTTTACTTCCTCC  |                     |           |
| <i>mmu-MKL2</i><br>(NM_181860.1)        | F: GGCTGCGTAAAAGAGGTGT     | 64.1                | 186       |
|                                         | R: TTCCGTTTCGTTTCAGAGTGG   |                     |           |
| <i>mmu-PARN</i><br>(XM_006522652.3)     | F: AAGAACGCAAAAGGAGAGAGC   | 60.3                | 169       |
|                                         | R: GGGCAGTAGAACTGATGAATCG  |                     |           |
| <i>mmu-BFAR</i><br>(XM_021209265.2)     | F: TTTGCTGAGAGATGGAGGAG    | 64.1                | 155       |
|                                         | R: GTTCAAGGTGGTGGGGTTA     |                     |           |
| <i>RRAD</i><br>(XM_018062096.1)         | F: CGAGTGC GTTTACAAGGTGC   | 65.0                | 187       |
|                                         | R: CCCATCCTGCTCCCAAATGT    |                     |           |
| <i>C3</i><br>(XM_018050944.1)           | F: ATCCCCTGACCATCACCGTA    | 59.5                | 103       |
|                                         | R: GAGTTCCCCTGCGTGTGTA     |                     |           |
| <i>LOC106503494</i><br>(XM_018038510.1) | F: GCACCCAAGAAGAAGTAGGTTG  | 60.3                | 190       |
|                                         | R: TTAGGTAGTGCCAGCCATCT    |                     |           |
| <i>LOC102174197</i><br>(XM_018045398.1) | F: GGGGCAGAACAAGTGGAGAA    | 60.3                | 119       |
|                                         | R: TCTTTGGTGGGGCTGTAGTG    |                     |           |
